# Supplementary material for: Regional sources of airborne ultrafine particle number and mass concentrations in California
Source: Copernicus journal article supplement (doi:10.5194/acp-19-14677-2019), 2019-12-05
Supplement: Supplementary file 1 [file acp-19-14677-2019-supplement.pdf]

Supplement of Atmos. Chem. Phys., 19, 14677–14702, 2019  
<https://doi.org/10.5194/acp-19-14677-2019-supplement>  
© Author(s) 2019. This work is distributed under  
the Creative Commons Attribution 4.0 License.

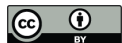

*Supplement of*

## **Regional sources of airborne ultrafine particle number and mass concentrations in California**

**Xin Yu et al.**

*Correspondence to:* Michael J. Kleeman ([mjkleeman@ucdavis.edu](mailto:mjkleeman@ucdavis.edu))

The copyright of individual parts of the supplement might differ from the CC BY 4.0 License.

## Supporting Information

Table S1 The PM profiles used for each source type were specified as weighted averages from each of the detailed sources within each broad category

| Source Type                | PM Source Profile                                                                                                                                                                                                                                                                             |
|----------------------------|-----------------------------------------------------------------------------------------------------------------------------------------------------------------------------------------------------------------------------------------------------------------------------------------------|
| On-road gasoline vehicles  | 10% Non-catalyst vehicle + 90% Catalyst Vehicle                                                                                                                                                                                                                                               |
| Off-road gasoline vehicles | 100% Non-catalyst vehicle                                                                                                                                                                                                                                                                     |
| On-road diesel vehicles    | 100% On-road diesel vehicle                                                                                                                                                                                                                                                                   |
| Off-road diesel vehicles   | 90% 1970's diesel vehicle + 7% 1980's diesel vehicle + 3% on-road diesel vehicle                                                                                                                                                                                                              |
| Food Cooking               | 85% meat frying + 15% charbroiling                                                                                                                                                                                                                                                            |
| Biomass burning            | 95% residential wood smoke + 5% waste burning                                                                                                                                                                                                                                                 |
| Natural gas combustion     | 100% natural gas combustion                                                                                                                                                                                                                                                                   |
| Other                      | 70% construction & demolition + 10% paved road travel + 4% farming ops + 3% brake wear + 2% cattle feedlot + 2% mining ops + 1% process heaters + 1% cement manufacturing + 3% wood processing + 1% solid waste disposal + 2% mineral processing + 1% asphalt production + 1% organic solvent |

Table S2 Meteorology evaluation metrics for the entire simulation period in SFBA counties (Alameda (ALA) county, Contra Costa (CC) county, Napa (NAP) county, San Francisco (SF) county, Santa Clara (SCL) county, San Mateo (SM) county, Solano (SOL) county) and two counties in Southern California (Los Angeles county (LA) and Riverside county (RV)).

| County | Temperature °C |      | Wind  |      |          | Relative Humidity |      |        |
|--------|----------------|------|-------|------|----------|-------------------|------|--------|
|        | MB             | RMSE | MFB   | MFE  | RMSE m/s | MFB               | MFE  | RMSE % |
| ALA    | 0.21           | 4.02 | -0.05 | 0.56 | 1.39     | -0.28             | 0.39 | 28.81  |
| CC     | 0.14           | 4.36 | 0.03  | 0.62 | 1.63     | -0.33             | 0.47 | 31.16  |
| NAP    | 0.12           | 4.25 | 0.05  | 0.59 | 1.71     | -0.38             | 0.49 | 35.96  |
| SF     | 0.11           | 4.14 | -0.08 | 0.64 | 2.14     | -0.33             | 0.46 | 35.49  |
| SCL    | 0.16           | 4.23 | -0.08 | 0.57 | 1.62     | -0.28             | 0.42 | 30.42  |
| SM     | 0.15           | 5.49 | -0.05 | 0.6  | 1.75     | -0.26             | 0.43 | 32.49  |
| SOL    | 0.13           | 4.67 | 0.10  | 0.56 | 1.37     | -0.36             | 0.47 | 35.23  |
| LA     | 0.10           | 3.91 | -0.12 | 0.58 | 1.66     | -0.14             | 0.35 | 27.31  |
| RV     | 0.12           | 4.34 | 0.07  | 0.59 | 1.28     | -0.11             | 0.38 | 26.28  |

Table S3 Locations of PNC for measurement sites used in the analysis

| Station name    | Address                                       | Latitude | Longitude |
|-----------------|-----------------------------------------------|----------|-----------|
| Anaheim         | 1630 Pampas Ln Anaheim, CA 92802              | 33.83    | -117.94   |
| Central LA      | 1630 North Main Street, Los Angeles, CA 90012 | 34.07    | -118.23   |
| Compton         | 700 North Bullis Rd Compton, CA 90221         | 33.90    | -118.21   |
| Huntington Park | 6301 S. Santa Fe Ave. 90221                   | 33.87    | -118.22   |
| Inland Valley   | 14360 Arrow Highway                           | 34.11    | -117.96   |
| Rubidoux        | 5891 Mission Blvd Riverside, CA 92509         | 34.00    | -117.42   |
| Livermore       | 793 Rincon Avenue, Livermore, CA 94551        | 37.69    | -121.78   |
| San Pablo       | 1865 Rumrill Boulevard, San Pablo, CA 94806   | 37.96    | -122.36   |
| Redwood City    | 897 Barron Avenue, Redwood City, CA 94063     | 37.48    | -122.20   |
| Santa Rosa      | 837 5th Street, Santa Rosa, CA 95404          | 38.44    | -122.71   |

Table S4 Statistics of PM<sub>2.5</sub> and PM<sub>2.5</sub> species

|     | MASS PM <sub>2.5</sub> | EC PM <sub>2.5</sub> | OC PM <sub>2.5</sub> | Nitrate | Sulfate | Ammonium |
|-----|------------------------|----------------------|----------------------|---------|---------|----------|
| MFB | -0.11                  | -0.18                | -0.32                | -0.2    | -0.41   | 0.22     |
| MFE | 0.26                   | 0.32                 | 0.46                 | 0.51    | 0.6     | 0.49     |

Table S5 Statistics of key gaseous pollutants

|            | O3    | NO    | NO2   | CO    | SO2    |
|------------|-------|-------|-------|-------|--------|
| MFB        | -0.05 | -0.14 | 0.22  | -0.21 | -0.23  |
| MFE        | 0.12  | 0.3   | 0.28  | 0.27  | 0.21   |
| RMSE (ppm) | 0.005 | 0.012 | 0.011 | 0.09  | -0.008 |

Table S6 ultrafine PM emission inventory from natural gas combustion in the commercial, industrial and electricity sectors for the entire SoCAB region and SFBA region during the summer and winter months.

|       |        | Electricity short tons/day | Industrial short tons/day | Commercial short tons/day |
|-------|--------|----------------------------|---------------------------|---------------------------|
| SoCAB | Summer | 1.95                       | 0.57                      | 0.69                      |
|       | Winter | 2.02                       | 0.58                      | 0.93                      |
| SFBA  | Summer | 0.18                       | 0.07                      | 0.88                      |
|       | Winter | 0.19                       | 0.25                      | 1.50                      |

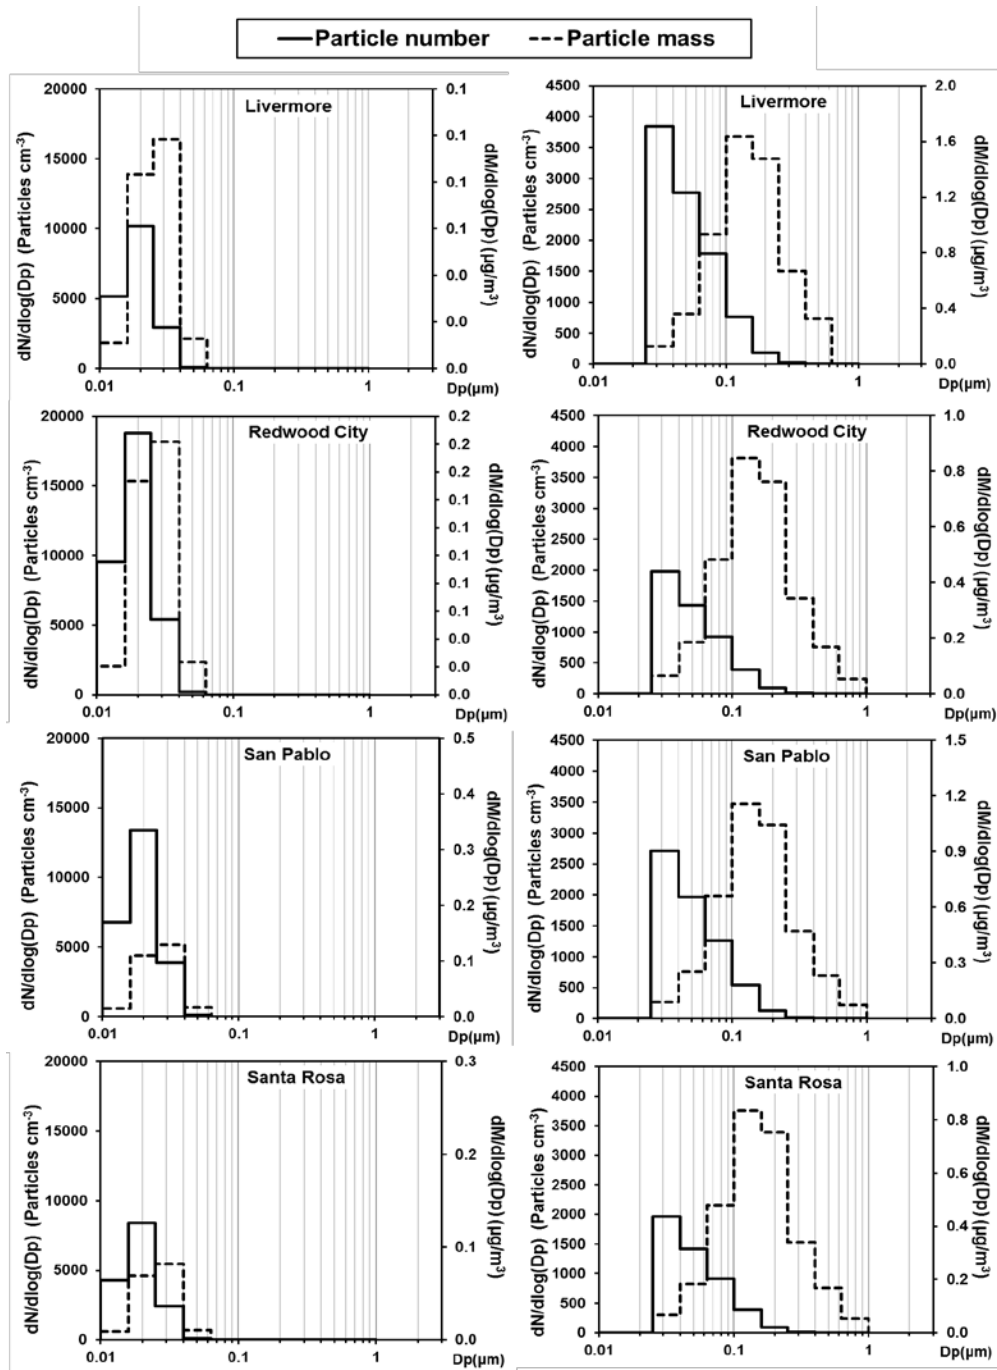

Figure S1 Particle number-size distribution and particle mass-size distribution for natural gas (left panel) and wood burning sources (right panel) at four evaluated sites in SFBA.

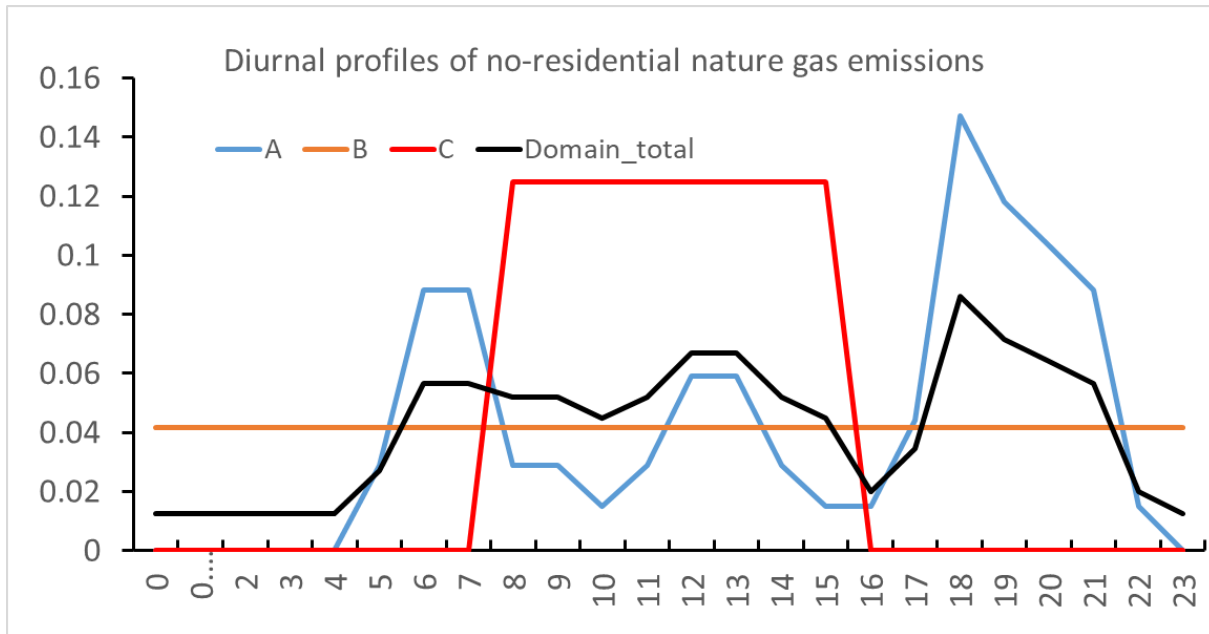

Figure S2. Diurnal profiles of no-residential natural gas emissions.

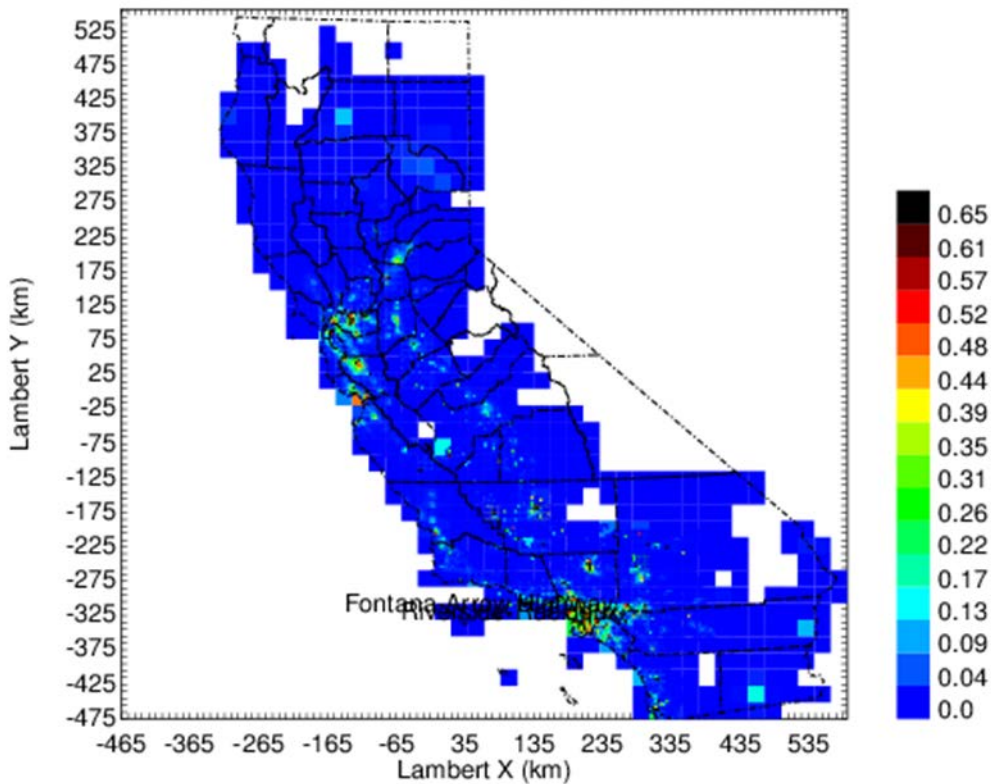

Figure S3: Daily-average natural gas combustion emissions in California. Units:  $\mu\text{g m}^{-2} \text{min}^{-1}$ .

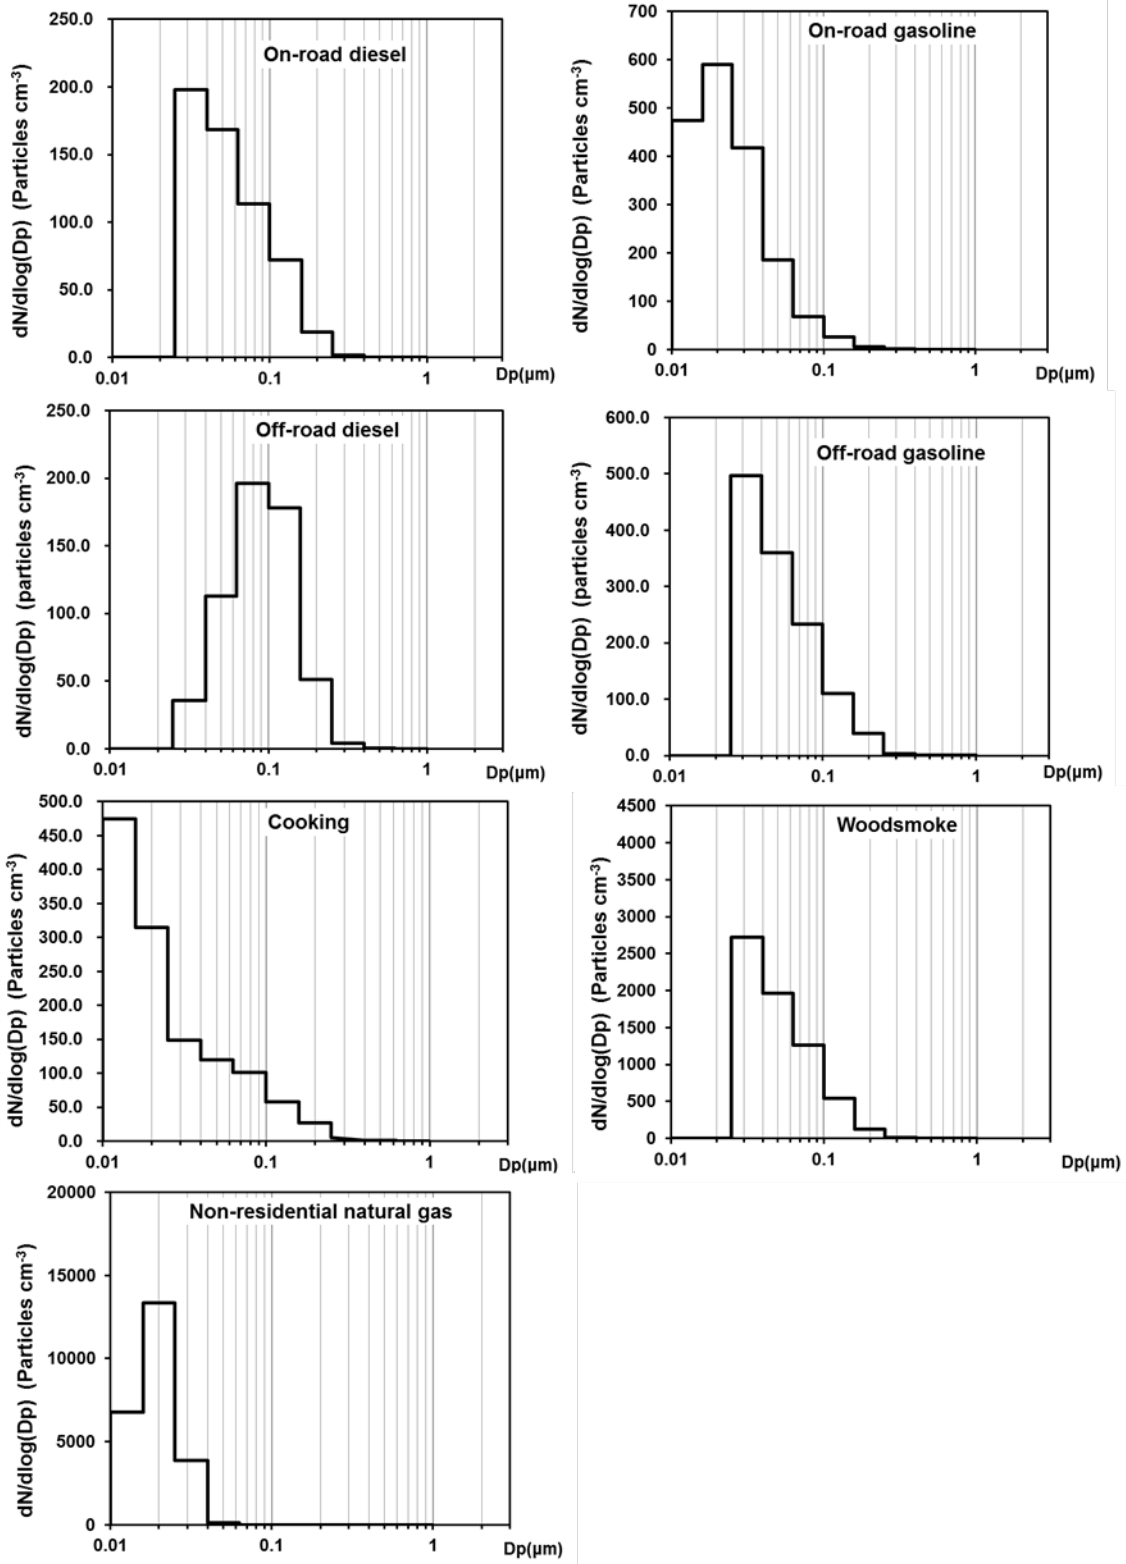

Figure S4 Particle size distributions of major sources calculated by UCD/CIT model at San Pablo.
